# Supplementary material for: Hydrogen-bonded networks of [Fe(bpp)2]2+spin crossover complexes and dicarboxylate anions: structural and photomagnetic properties
Source: Royal Society of Chemistry journal article supplement (doi:10.1039/c6dt02934e), 2016-01-01
Supplement: c6dt02934e1.pdf [file c6dt02934e1.pdf]

## Supplementary Information

### Hydrogen-bonded Networks of $[\text{Fe}(\text{bpp})_2]^{2+}$ Spin Crossover Complexes and dicarboxylate anions: structural and photomagnetic properties

Verónica Jornet-Mollá, Yan Duan, Carlos Giménez-Saiz, João C. Waerenborgh and Francisco M. Romero\*

**Table S1** Intermolecular hydrogen bonds in the crystal structure of  $1 \cdot 4\text{H}_2\text{O}$ .<sup>a</sup>

---

| D...A           | $d_{\text{D}\cdots\text{A}}/\text{Å}$ |
|-----------------|---------------------------------------|
| N(1)...O(4)#1   | 2.612(18)                             |
| N(5)...O(2)#2   | 2.768(12)                             |
| N(6)...O(3)     | 2.673(2)                              |
| N(10)...O(1W)   | 2.700(9)                              |
| O(1)...O(3W)    | 2.727(2)                              |
| O(2)...O(2W)    | 2.844(15)                             |
| O(2)...O(4W)#3  | 2.790(2)                              |
| O(3)...O(1W)#4  | 2.745(7)                              |
| O(1W)...O(4W)#5 | 2.717(7)                              |
| O(2W)...O(2W)#6 | 2.861(4)                              |
| O(2W)...O(3W)#3 | 2.842(19)                             |
| O(3W)...O(4W)   | 2.756(13)                             |

---

<sup>a</sup> Symmetry transformations used to generate equivalent atoms:

#1  $x - 1, -y + 1/2, z - 1/2$     #2  $-x, y - 1/2, -z + 3/2$   
#3  $x - 1, y, z$                     #4  $x + 1, y, z$   
#5  $x - 1, -y + 1/2, z + 1/2$     #6  $-x, -y + 1, -z + 2$

---

**Table S2** Intermolecular hydrogen bonds in the crystal structure of  $2 \cdot 2\text{MeOH} \cdot \text{H}_2\text{O}$ .<sup>a</sup>

| D...A           | $d_{\text{D...A}}/\text{\AA}$ |
|-----------------|-------------------------------|
| N(1)...O(3)#1   | 2.649(6)                      |
| N(5)...O(4)#2   | 2.641(6)                      |
| N(6)...O(6)     | 2.679(7)                      |
| N(10)...O(8)    | 2.592(6)                      |
| N(11)...O(1)    | 2.591(6)                      |
| N(15)...O(2)#3  | 2.704(7)                      |
| N(16)...O(3S)   | 2.638(6)                      |
| N(20)...O(1W)#4 | 2.635(6)                      |
| O(2)...O(4S)#5  | 2.731(9)                      |
| O(3)...O(1S)#1  | 2.784(8)                      |
| O(5)...O(2S)#3  | 2.702(6)                      |
| O(5)...O(2W)#3  | 2.811(8)                      |
| O(6)...O(1W)    | 2.793(7)                      |
| O(7)...O(3S)    | 2.591(7)                      |
| O(1W)...O(2W)   | 2.780(8)                      |
| O(2W)...O(2S)#6 | 2.806(8)                      |

<sup>a</sup> Symmetry transformations used to generate equivalent atoms:

|                         |                             |
|-------------------------|-----------------------------|
| #1 $-x, -y + 1, -z + 2$ | #2 $-x + 1, -y + 1, -z + 2$ |
| #3 $x - 1, y, z$        | #4 $x, y + 1, z$            |
| #5 $x + 1, y, z$        | #6 $-x + 1, -y, -z + 1$     |

**Table S3** Intermolecular hydrogen bonds in the crystal structure of  $2 \cdot 5\text{H}_2\text{O}$ .<sup>a</sup>

---

| D...A           | $d_{\text{D...A}}/\text{\AA}$ |
|-----------------|-------------------------------|
| N(1)...O(1W)#1  | 2.651(9)                      |
| N(5)...O(2)#2   | 2.584(11)                     |
| N(6)...O(3B)#1  | 2.885(15)                     |
| N(6)...O(9W)#1  | 2.520(11)                     |
| N(10)...O(3A)#3 | 2.705(13)                     |
| N(10)...O(4B)#3 | 2.567(13)                     |
| O(1)...O(2W)    | 2.938(12)                     |
| O(1)...O(3W)    | 2.924(11)                     |
| O(2)...O(1W)#4  | 2.739(11)                     |
| O(3B)...O(8W)#5 | 2.849(15)                     |
| O(4A)...O(10W)  | 2.572(13)                     |
| O(4A)...O(8W)   | 2.883(15)                     |
| O(1W)...O(2W)   | 2.724(8)                      |
| O(3W)...O(3W)#6 | 2.811(6)                      |
| O(4W)...O(6W)   | 2.702(8)                      |
| O(5W)...O(6W)#7 | 2.960(8)                      |
| O(7W)...O(8W)#7 | 2.910(8)                      |
| O(7W)...O(10W)  | 2.499(8)                      |
| O(8W)...O(9W)#1 | 2.458(7)                      |

---

<sup>a</sup> Symmetry transformations used to generate equivalent atoms:

#1  $x - 1, y, z$  #2  $x, y - 1, z$  #3  $x - 1, y - 1, z$   
#4  $x, y + 1, z$  #5  $x + 1, y, z$  #6  $-x, -y + 1, -z - 1$   
#7  $-x + 1, -y + 1, -z$

---

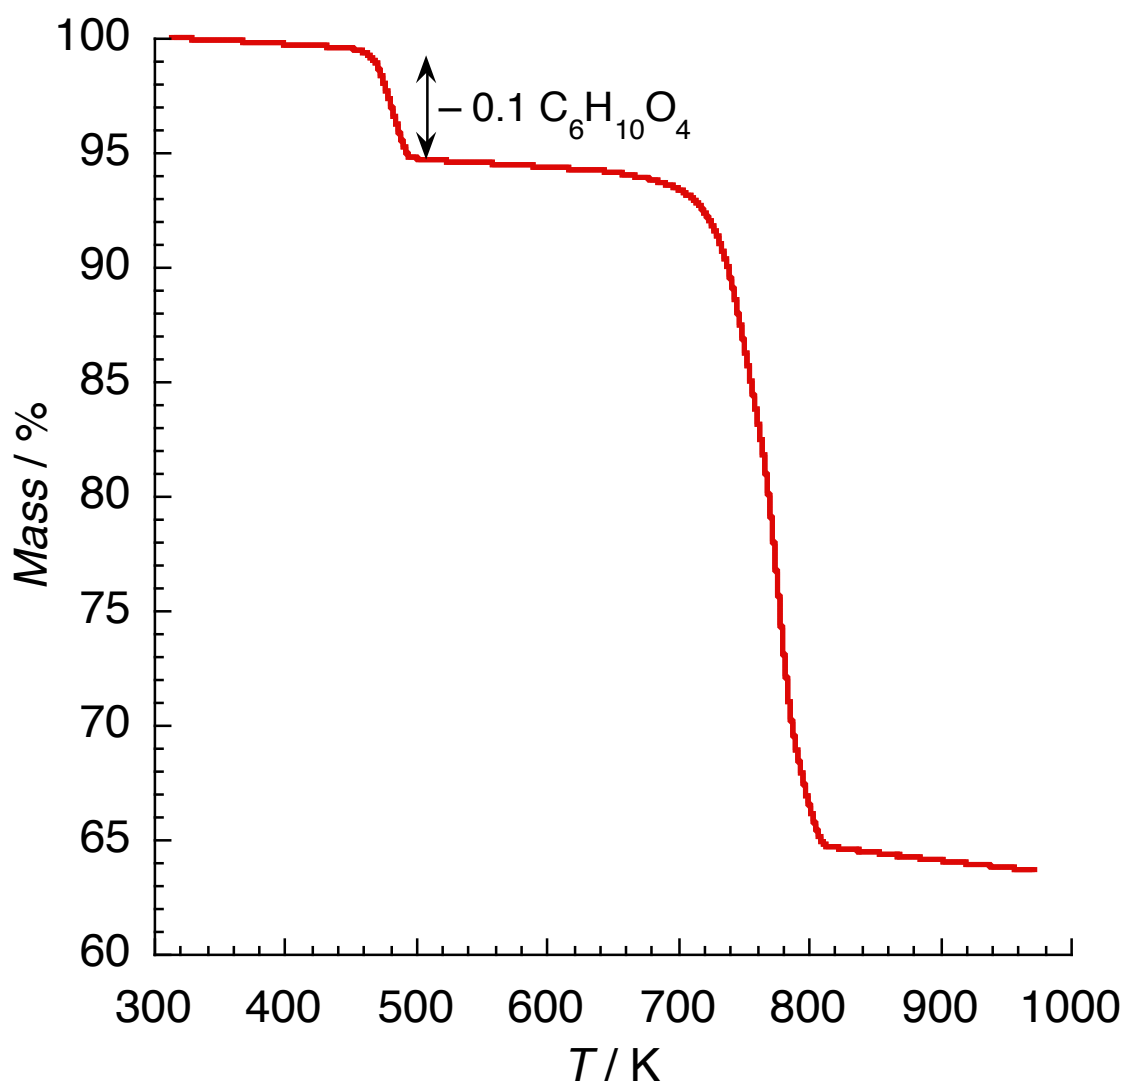

**Fig. S1.** Thermogravimetric analysis of  $\text{Ba}(\text{C}_6\text{H}_8\text{O}_4) \cdot 0.1 \text{ C}_6\text{H}_{10}\text{O}_4$ . The plot shows the loss of the adipic acid content. Water molecules of crystallization are not present in this salt.

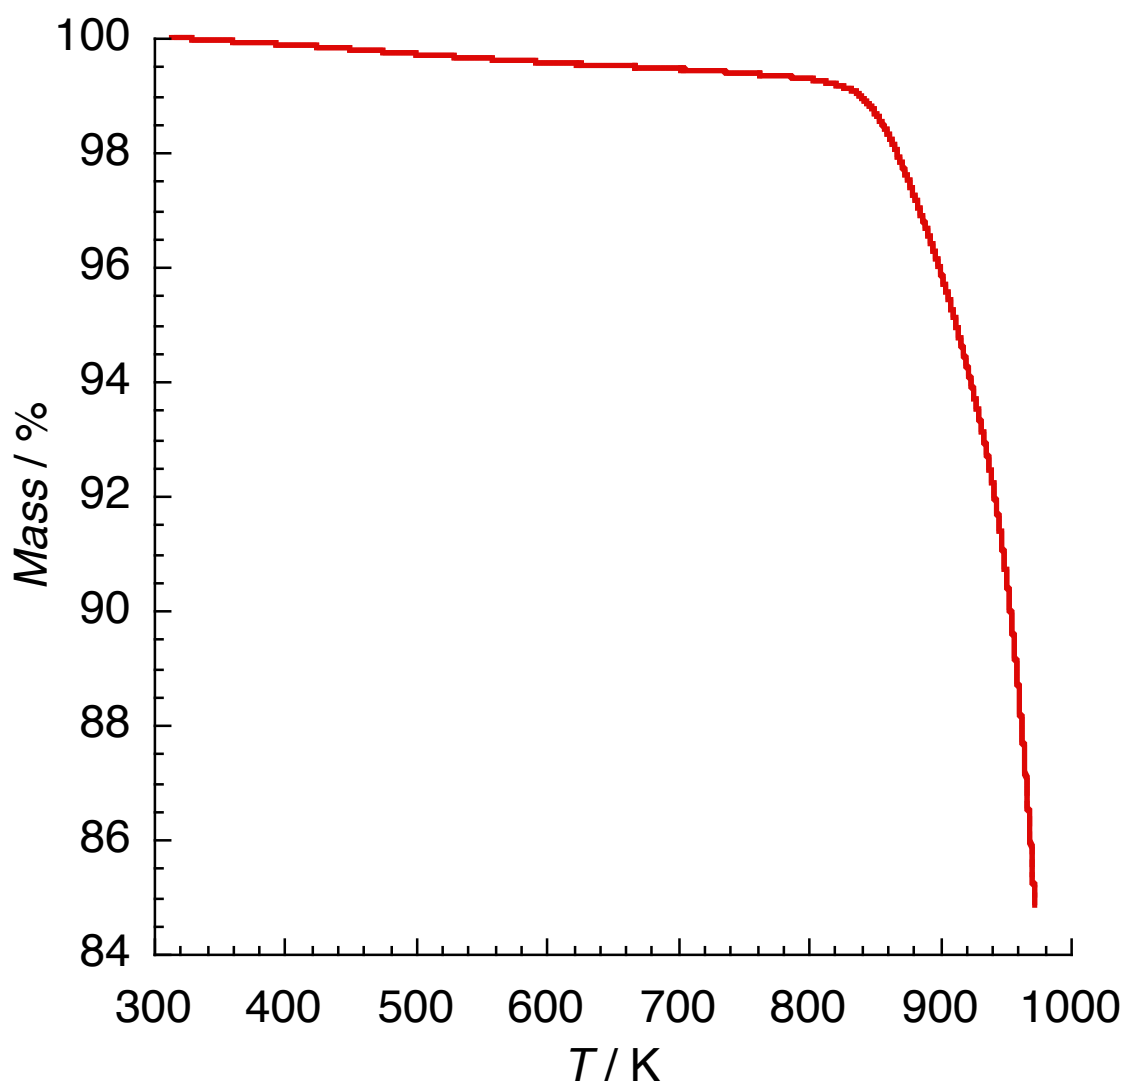

**Fig. S2.** Thermogravimetric analysis of Ba(C<sub>8</sub>H<sub>4</sub>O<sub>4</sub>). The plot confirms the anhydrous character of this salt.

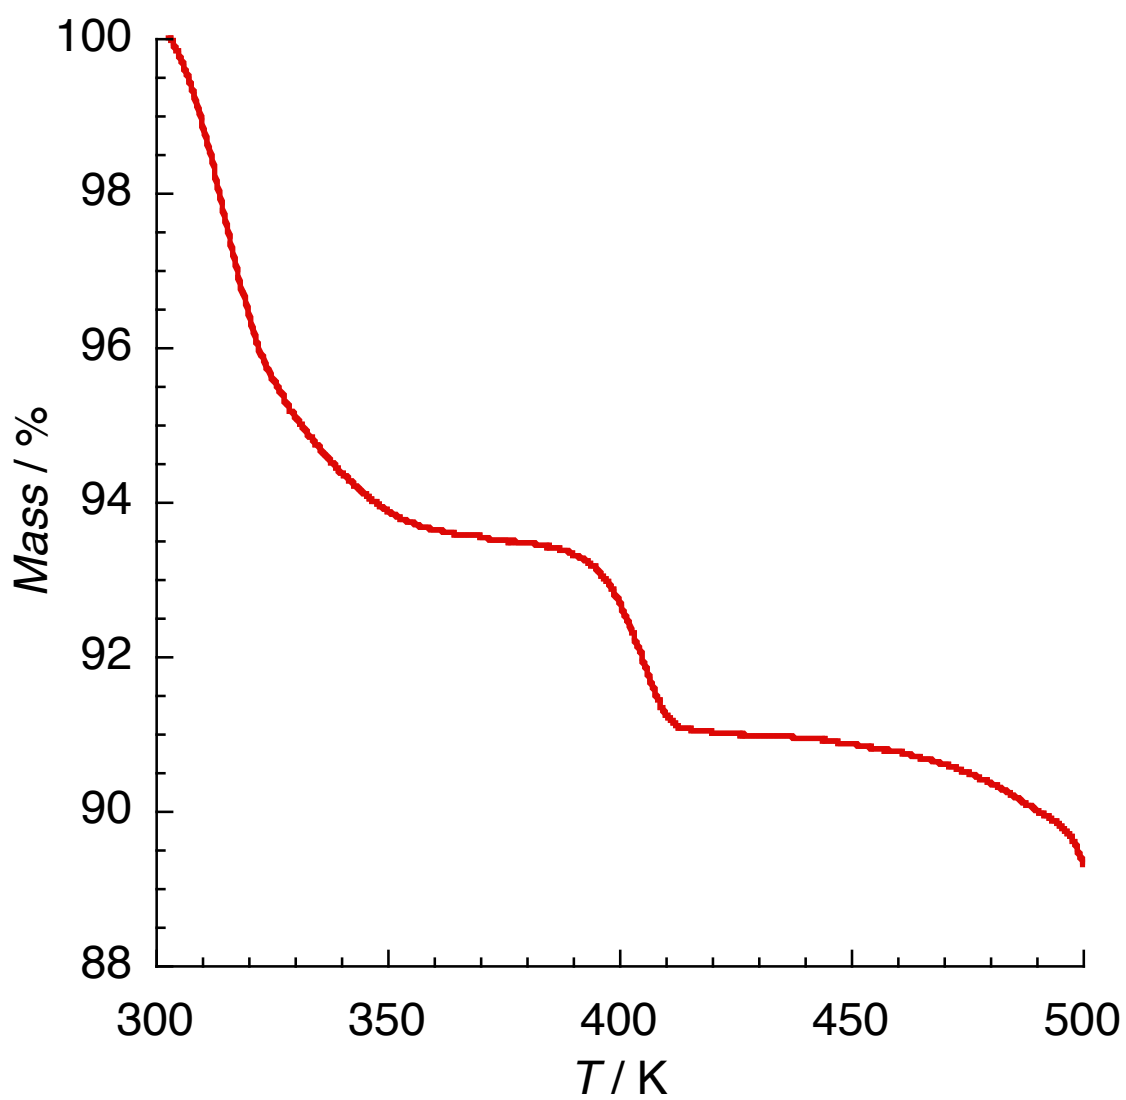

**Fig. S3.** Thermogravimetric analysis of **1·4H<sub>2</sub>O**.

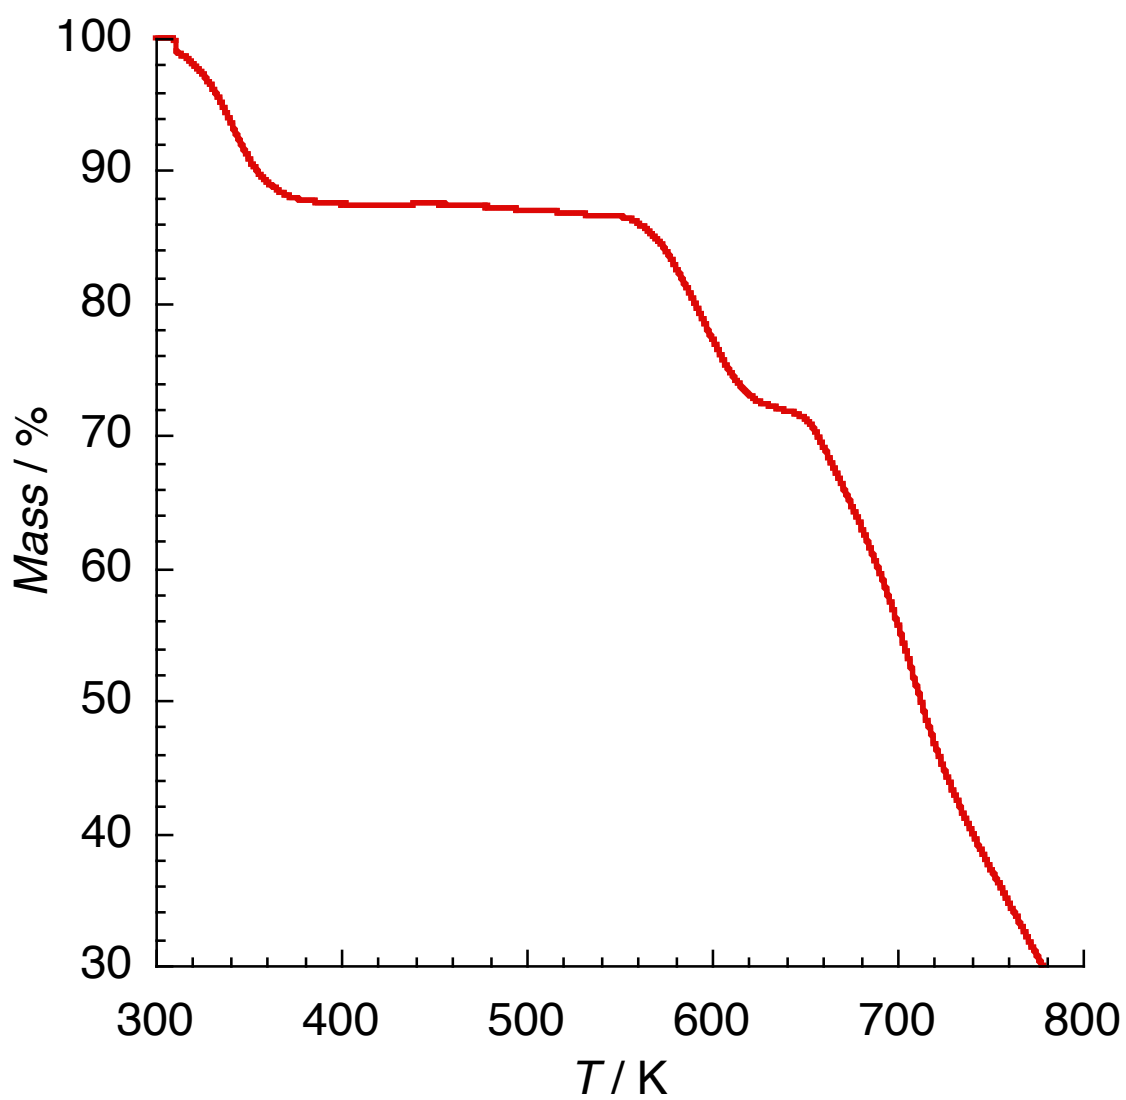

**Fig. S4.** Thermogravimetric analysis of 2·5H<sub>2</sub>O.

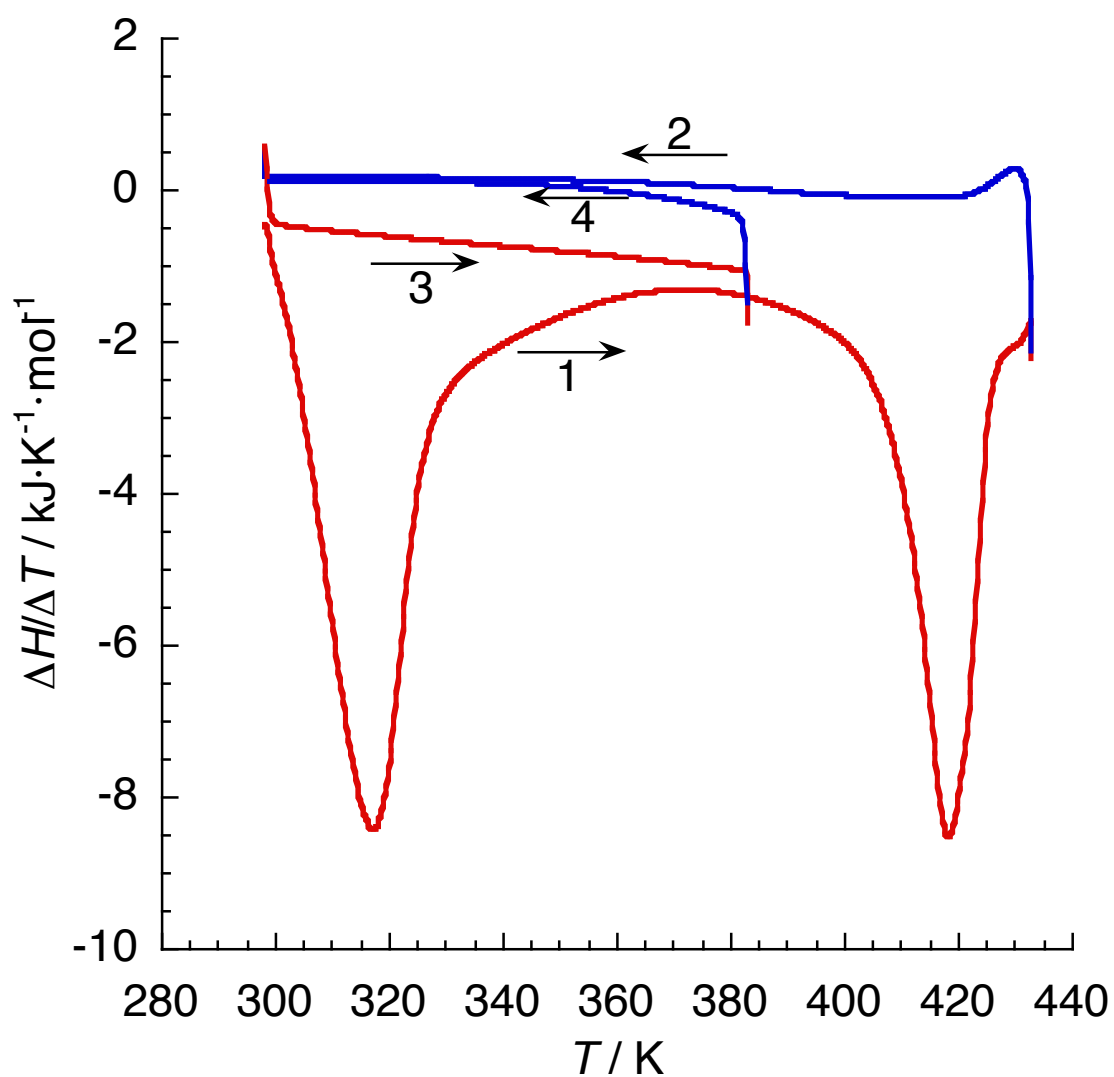

**Fig. S5.** Differential scanning calorimetry of  $1 \cdot 4\text{H}_2\text{O}$ . Curve 1: first heating (dehydration process). Curve 2: first cooling. Curves 3 and 4: second temperature cycle.



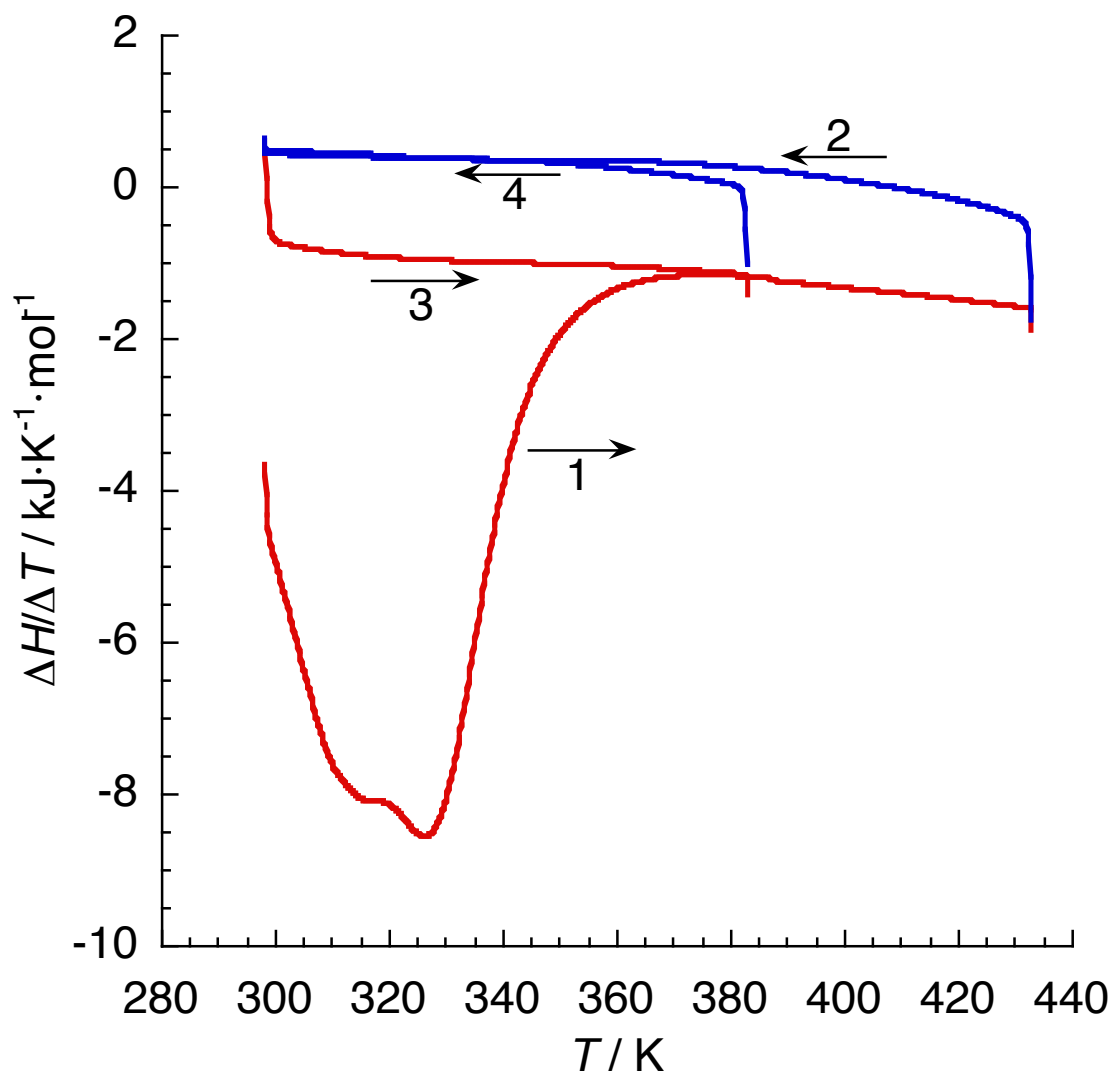

**Fig. S6.** Differential scanning calorimetry of  $2 \cdot 5\text{H}_2\text{O}$ . Curve 1: first heating (dehydration process). Curve 2: first cooling. Curves 3 and 4: second temperature cycle.

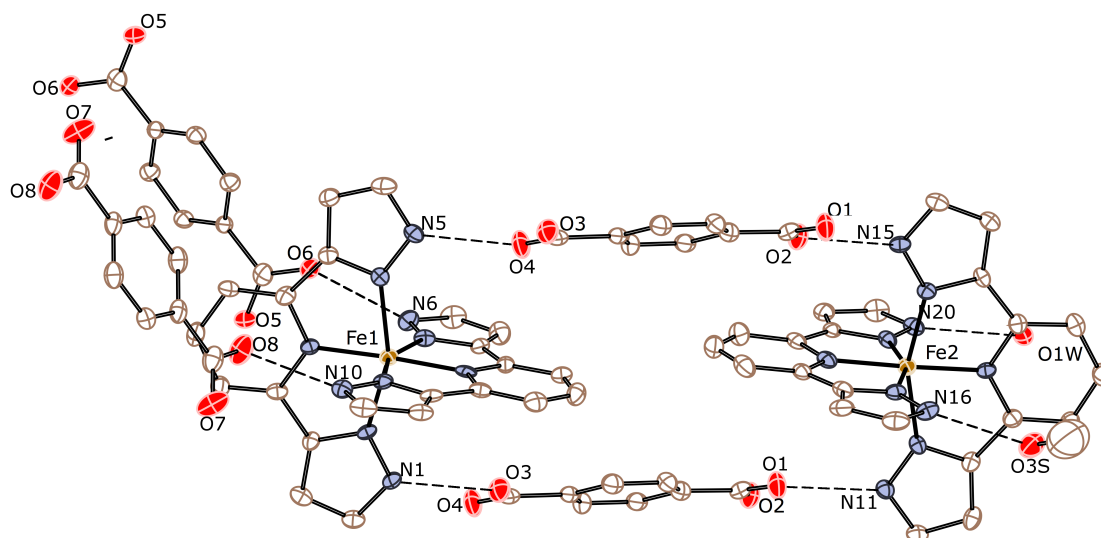

**Fig. S7.** Thermal ellipsoid plot of the crystal structure of  $2 \cdot 2\text{MeOH} \cdot \text{H}_2\text{O}$  showing the two inequivalent  $[\text{Fe}(\text{bpp})_2]^{2+}$  cations, the three crystallographically independent terephthalate anions and the two solvent molecules present in the second coordination sphere of the Fe2 site. Dashed lines refer to H bonds. Thermal ellipsoids are drawn at the 50 % probability level.

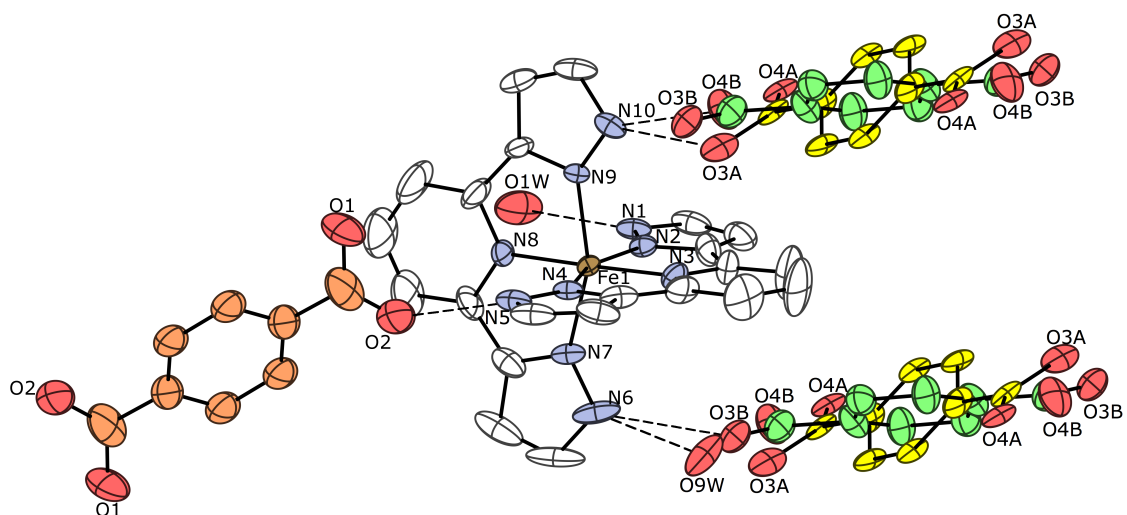

**Fig. S8** Thermal ellipsoid plot of the crystal structure of  $2 \cdot 5\text{H}_2\text{O}$  showing the second coordination sphere of the iron(II) complexes. Two terephthalate anions are disordered into two positions, A (yellow) and B (green). Thermal ellipsoids are drawn at the 50 % probability level.

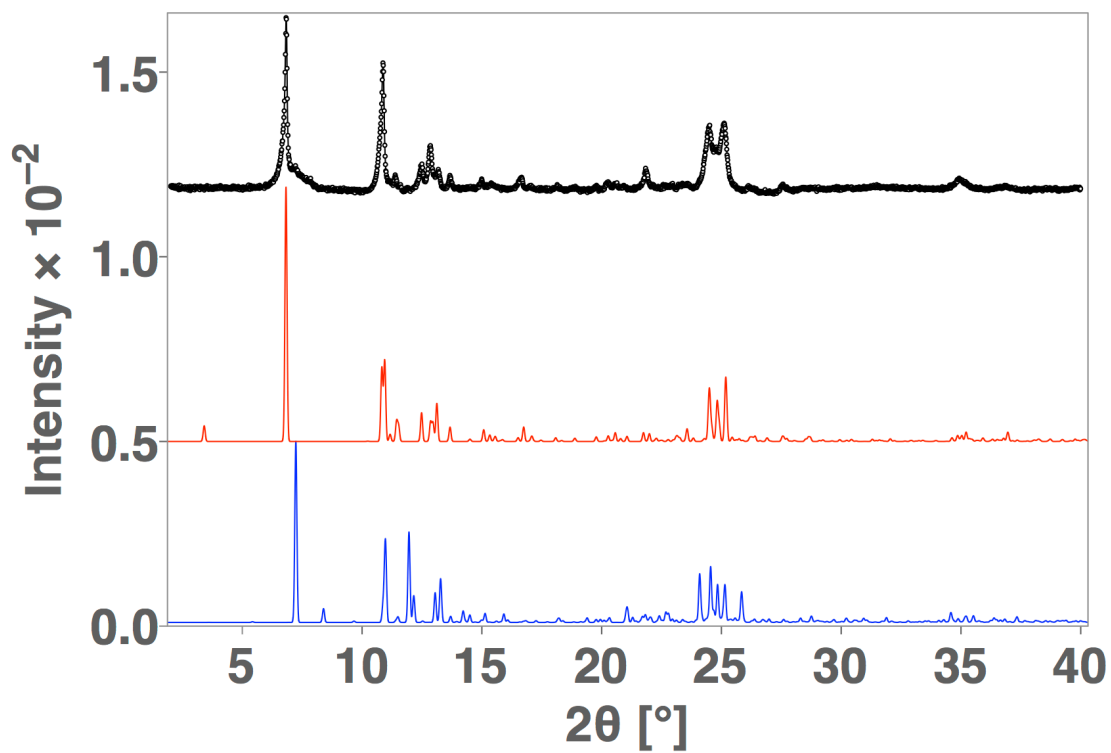

**Fig. S9** Comparison of the powder diffractogram of  $2 \cdot 5H_2O$  with simulations obtained from single crystal data of  $2 \cdot 5H_2O$  and  $2 \cdot 2MeOH \cdot H_2O$  (red and blue lines, respectively).

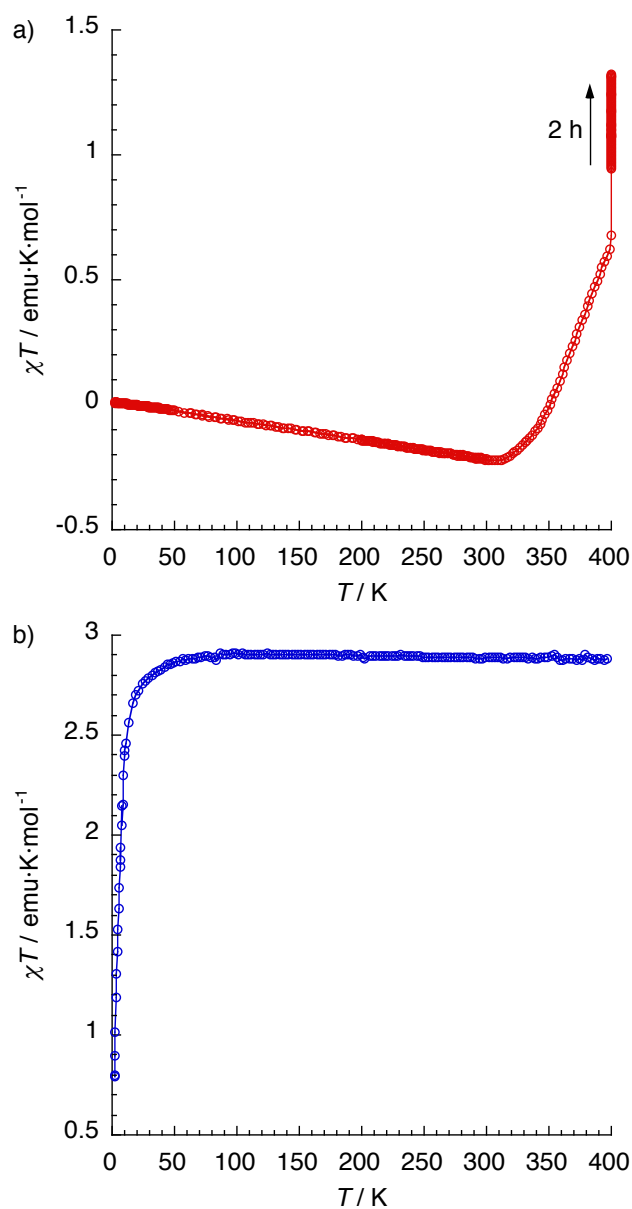

**Fig. S10** Thermal variation of the  $\chi T$  product of a) an as synthesized sample of  $\mathbf{1}\cdot 4\text{H}_2\text{O}$ ; b) a dehydrated sample of  $\mathbf{1}$ . No diamagnetic corrections were applied.

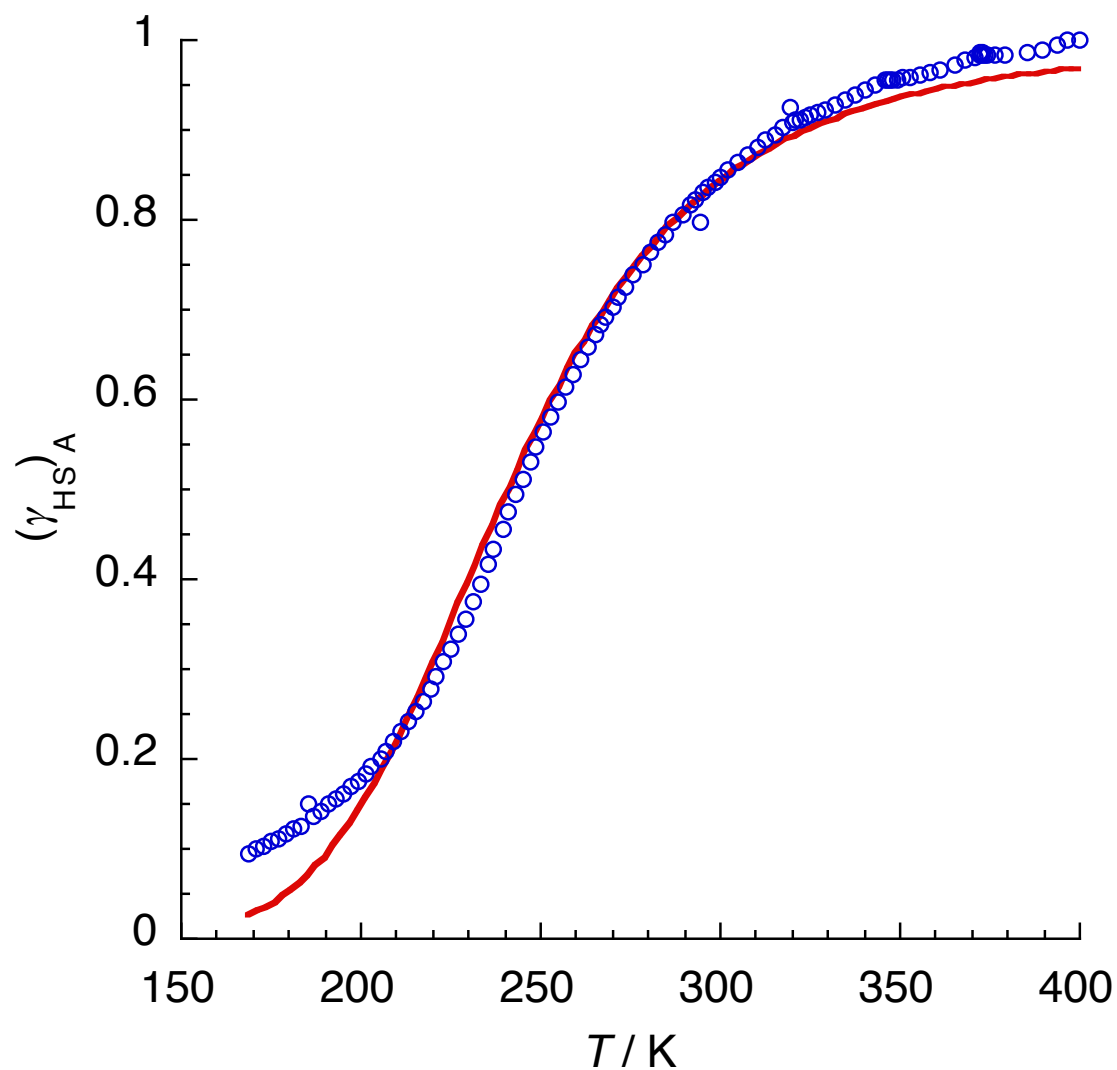

**Fig. S11.** Temperature dependence of the fraction of high-spin centers corresponding to iron site A,  $(\gamma_{HS})_A$ , of compound **2**.  $(\gamma_{HS})_A$  was calculated from the overall fraction of high-spin centers  $\gamma_{HS}$  following the equation  $(\gamma_{HS})_A = 2\gamma_{HS} - 1$ . The red line corresponds to the best fit to a Boltzmann distribution with thermodynamic parameters  $\Delta H = 17.2 \pm 0.3 \text{ kJ}\cdot\text{mol}^{-1}$  and  $\Delta S = 57.8 \pm 1.2 \text{ J}\cdot\text{K}^{-1}\cdot\text{mol}^{-1}$
